# Supplementary material
Source: PubMed Central journal article supplement (PMC6344048)

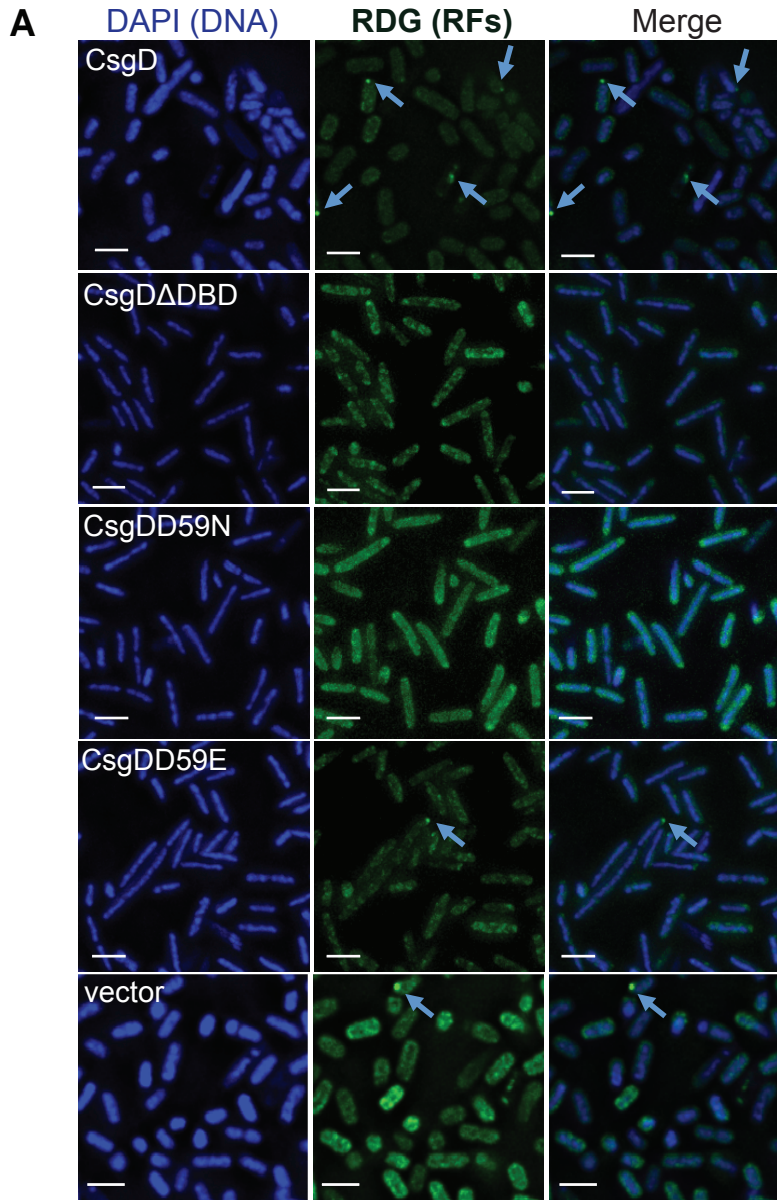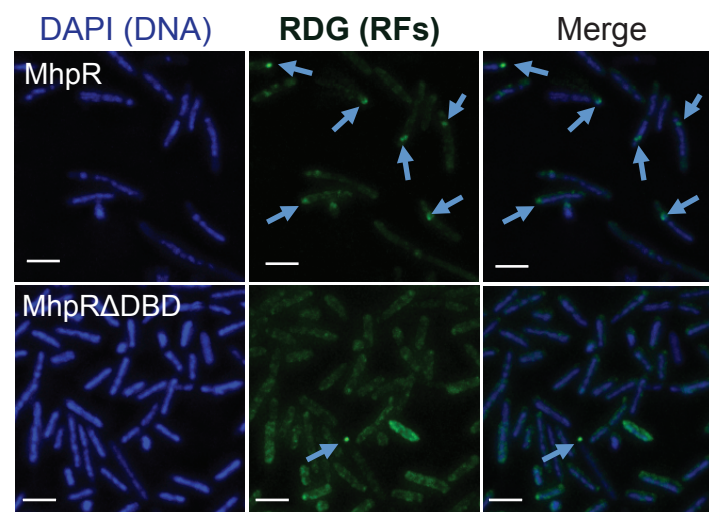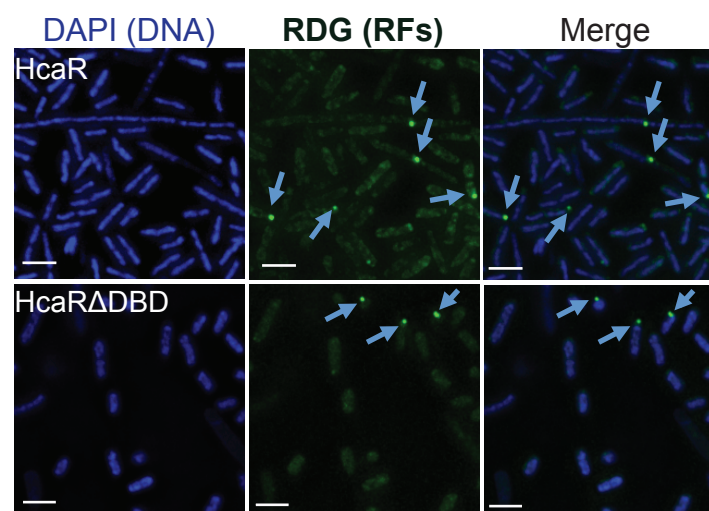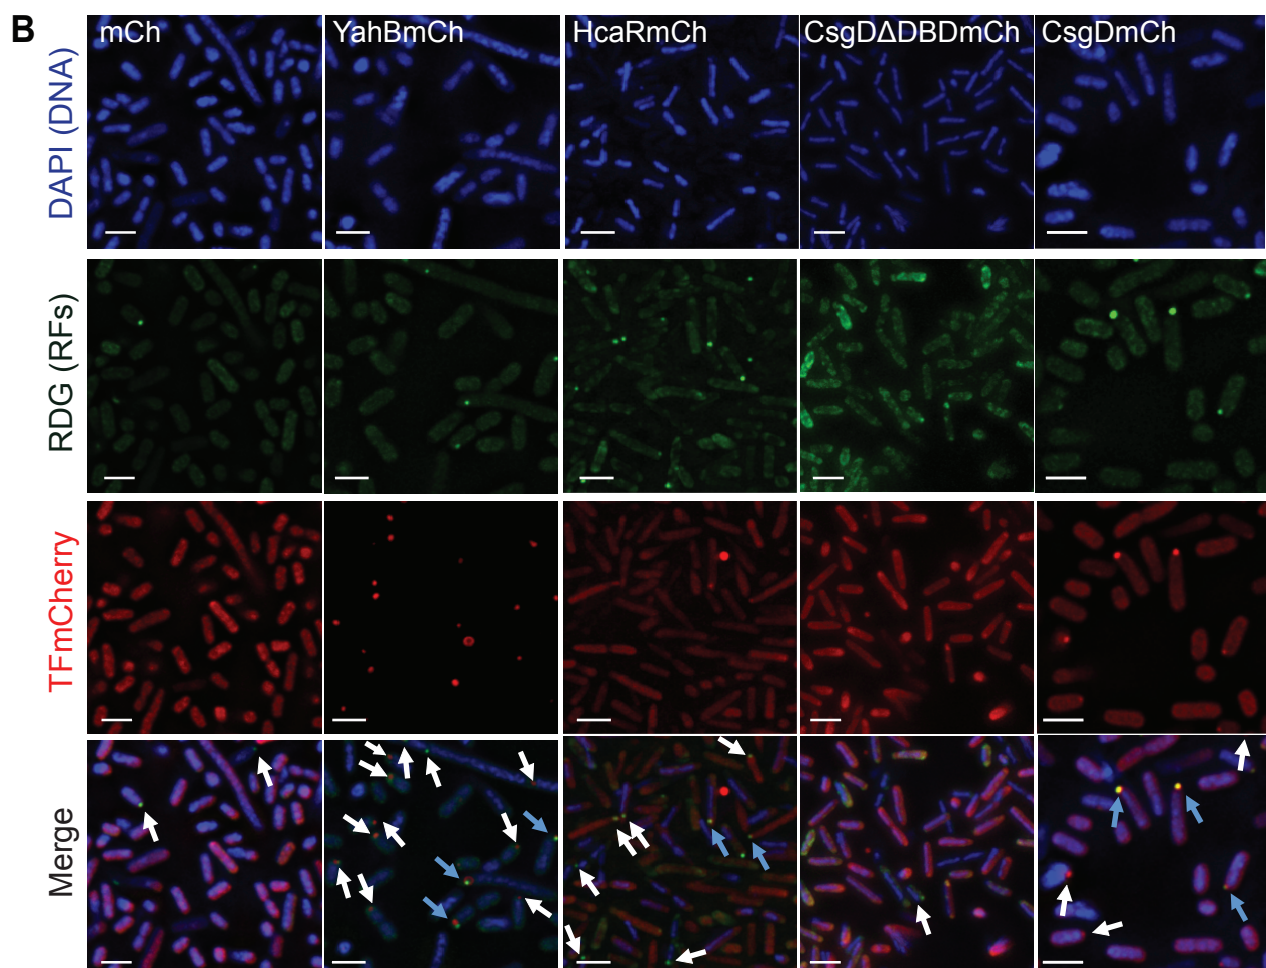

Supplement: NIHMS1516482-supplement-6.pdf [file NIHMS1516482-supplement-6.pdf]
